# Supplementary material
Source: PubMed Central journal article supplement (PMC9284419)
Supplement: NIHMS1737709-supplement-1737709_Sup_Tab_1.pdf [file NIHMS1737709-supplement-1737709_Sup_Tab_1.pdf]

Supplementary Table 1. CRISPR primer sequences

| Name           | Gene       | Exon | Targeting Sequence              | Forward Primer            | Reverse Primer            |
|----------------|------------|------|---------------------------------|---------------------------|---------------------------|
| Control-1      | scrambled  | --   | ACGGAGGCTAAGCGTCGCAA            | CACCGACGGAGGCTAAGCGTCGCAA | AAACTTGCACGCTTAGCCTCCGT   |
| $\Delta$ MTR-1 | <i>MTR</i> | 15   | TTGGAGGAGTCGATGCACAA <b>AGG</b> | CACCGTTGGAGGAGTCGATGCACAA | AAACTTGTGCATCGACTCCTCCAAC |
| $\Delta$ MTR-2 | <i>MTR</i> | 28   | ACCTGGGTCCAATAAACGT <b>GGG</b>  | CACCGACCTGGGTCCAATAAACGT  | AAACACGTTATTGGGACCCAGGTC  |
