# Supplementary material
Source: PubMed Central journal article supplement (PMC9284419)

**Source file for Extended Fig. 1g**  
Uncropped Western blots

MTR

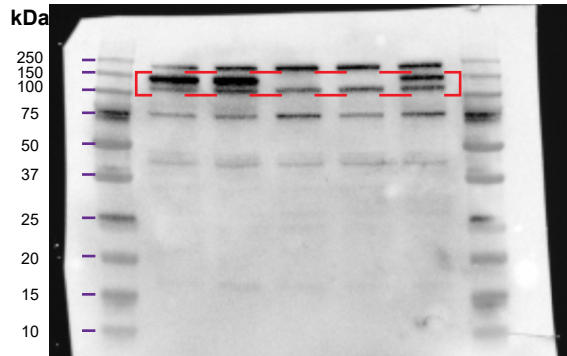

eGFP

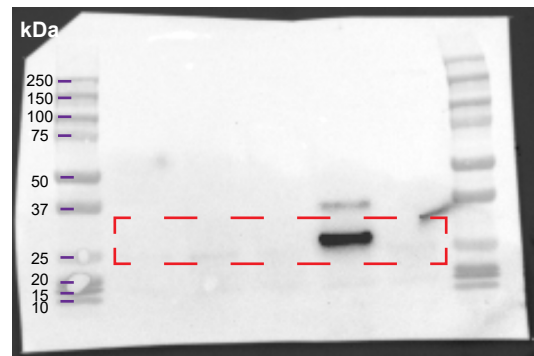

COXIV

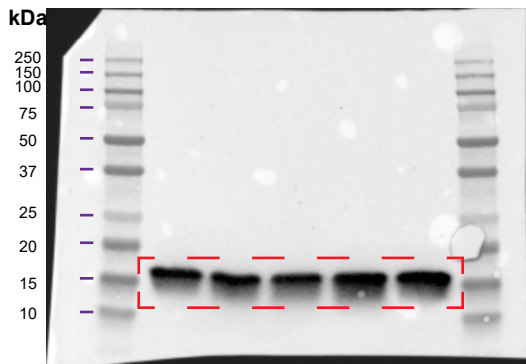

FLAG

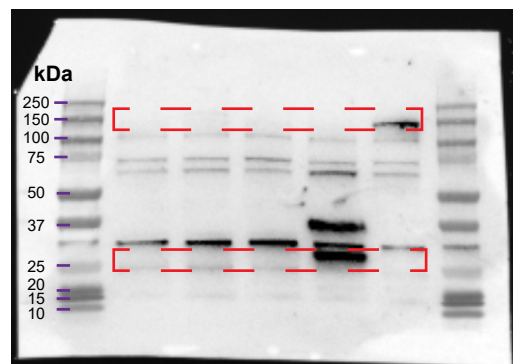

Supplement: NIHMS1737709-supplement-1737709_SD_ED_Fig_2_unprocessed_blots.pdf [file NIHMS1737709-supplement-1737709_SD_ED_Fig_2_unprocessed_blots.pdf]

**Source file for Fig. 2a**  
Uncropped Western blots

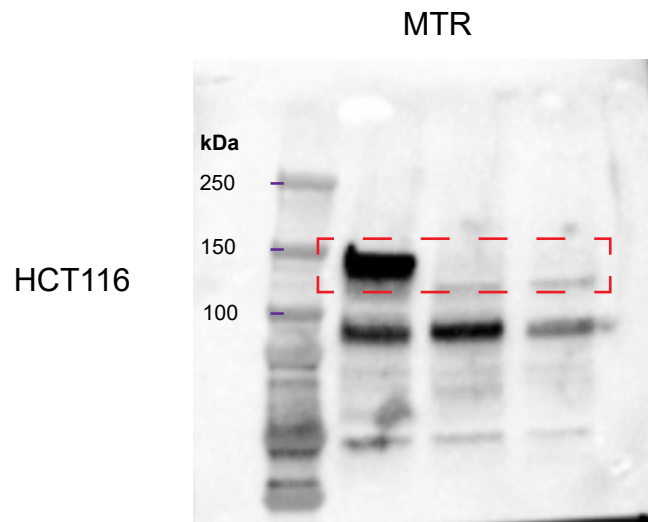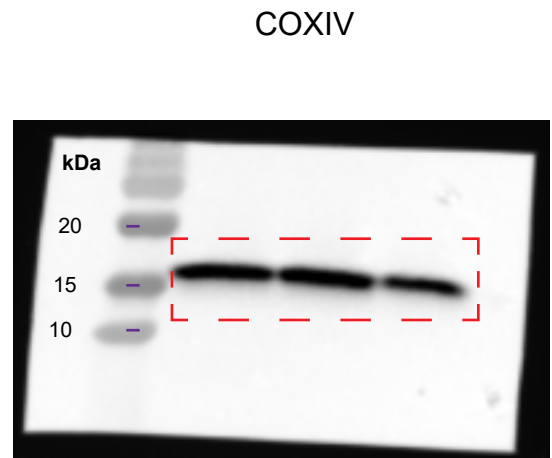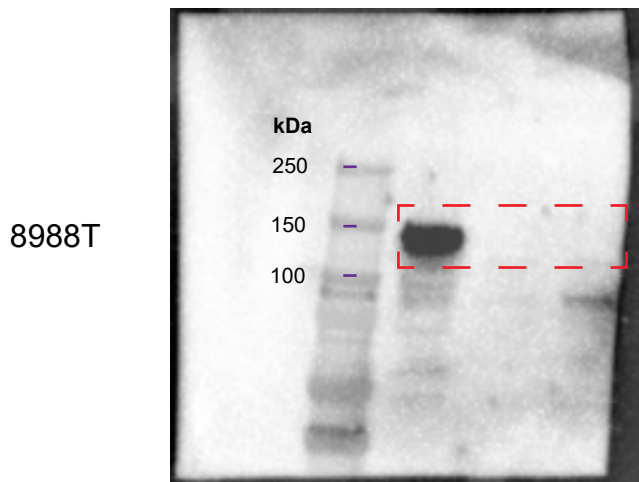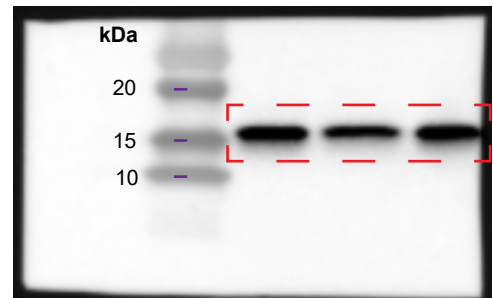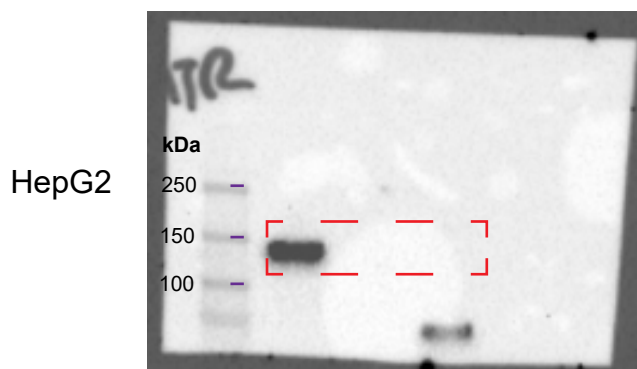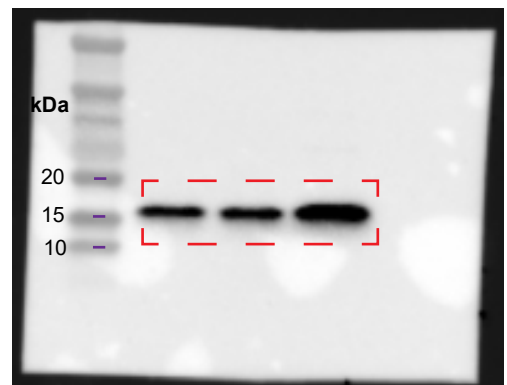

Supplement: NIHMS1737709-supplement-1737709_SD_Fig_2_unprocessed_blots.pdf [file NIHMS1737709-supplement-1737709_SD_Fig_2_unprocessed_blots.pdf]
